# Supplementary material for: Aggrecanase-selective tissue inhibitor of metalloproteinase-3 (TIMP3) protects articular cartilage in a surgical mouse model of osteoarthritis
Source: PubMed Central journal article supplement (PMC7283274; doi:10.1038/s41598-020-66233-0), 2020-06-09

## Supplementary Information

### **Aggrecanase-selective tissue inhibitor of metalloproteinase-3 (TIMP3) protects articular cartilage in a surgical mouse model of osteoarthritis**

Hiroyuki Nakamura<sup>1,2\*</sup>, Phoung Vo<sup>2</sup>, Ioannis Kanakis<sup>3</sup>, Ke Liu<sup>3</sup>, and George Bou-Gharios<sup>3</sup>

<sup>1</sup>Department of Oral and Maxillofacial Surgery, Kanazawa University Graduate School of Medical Science Kanazawa, Ishikawa, Japan. <sup>2</sup>Matrix Biology Department, the Kennedy Institute of Rheumatology Division, Imperial College London, Hammersmith, London, UK. <sup>3</sup>Institute of Ageing and Chronic Disease, University of Liverpool, William Henry Duncan Building, Liverpool, UK

\*e-mail: hnak@me.com

**Supplementary Figure S1:** Representative images of Safranin-O stained sections of the medial condyle and tibial plateau of non-transgenic mice (WT), TIMP3-Tg heterozygous, and [-1A] TIMP3-Tg heterozygous in skeletally mature mice at 18 weeks of age to show similarity of the articular cartilage proteoglycan composition. Bars, 200  $\mu$ m.

**Supplementary Figure S2:** (a) Comparison of expression in transgenic mice by determining  $\beta$ -galactosidase activity in [-1A]TIMP3 line 7 (n=7) and [-1A]TIMP3 line (n=5, line 7). Values represent the mean  $\pm$  SEM. (b) Representative images of Safranin-O stained sections from [-1A]TIMP3 lines 7 and 13 showing that cartilage was protected in mice expressing high levels of the [-1A]TIMP3 transgene (line 7) but not in low expressing transgenic line 13. (c) Histological maximum and summed scores of joints, 8 weeks after the induction of DMM or sham operated control

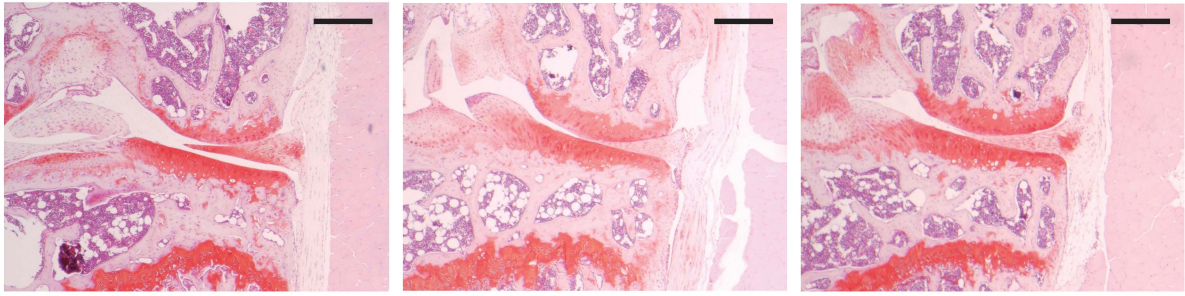

WT

TIMP3-Tg

[-1A]TIMP3-Tg

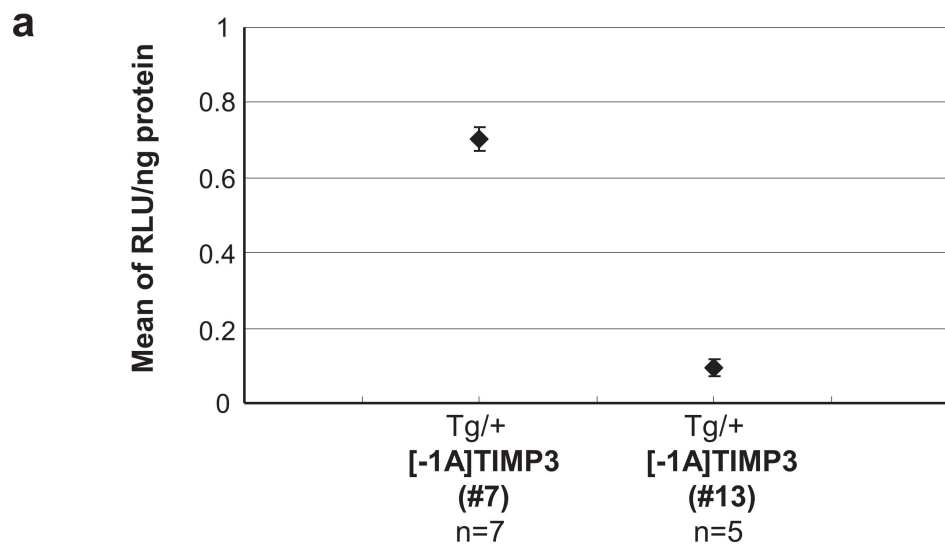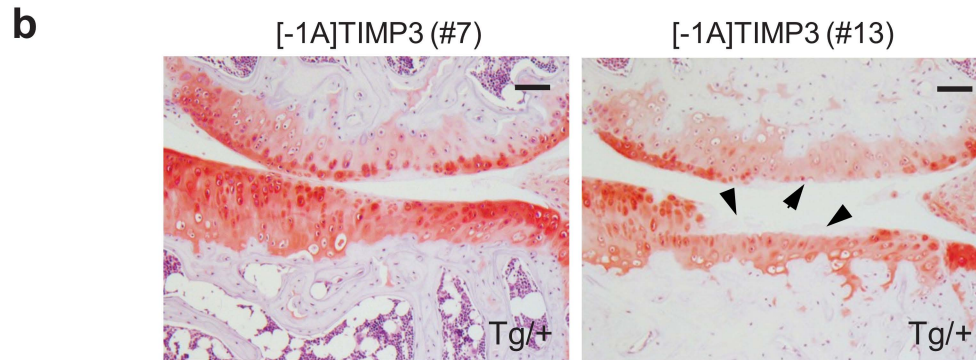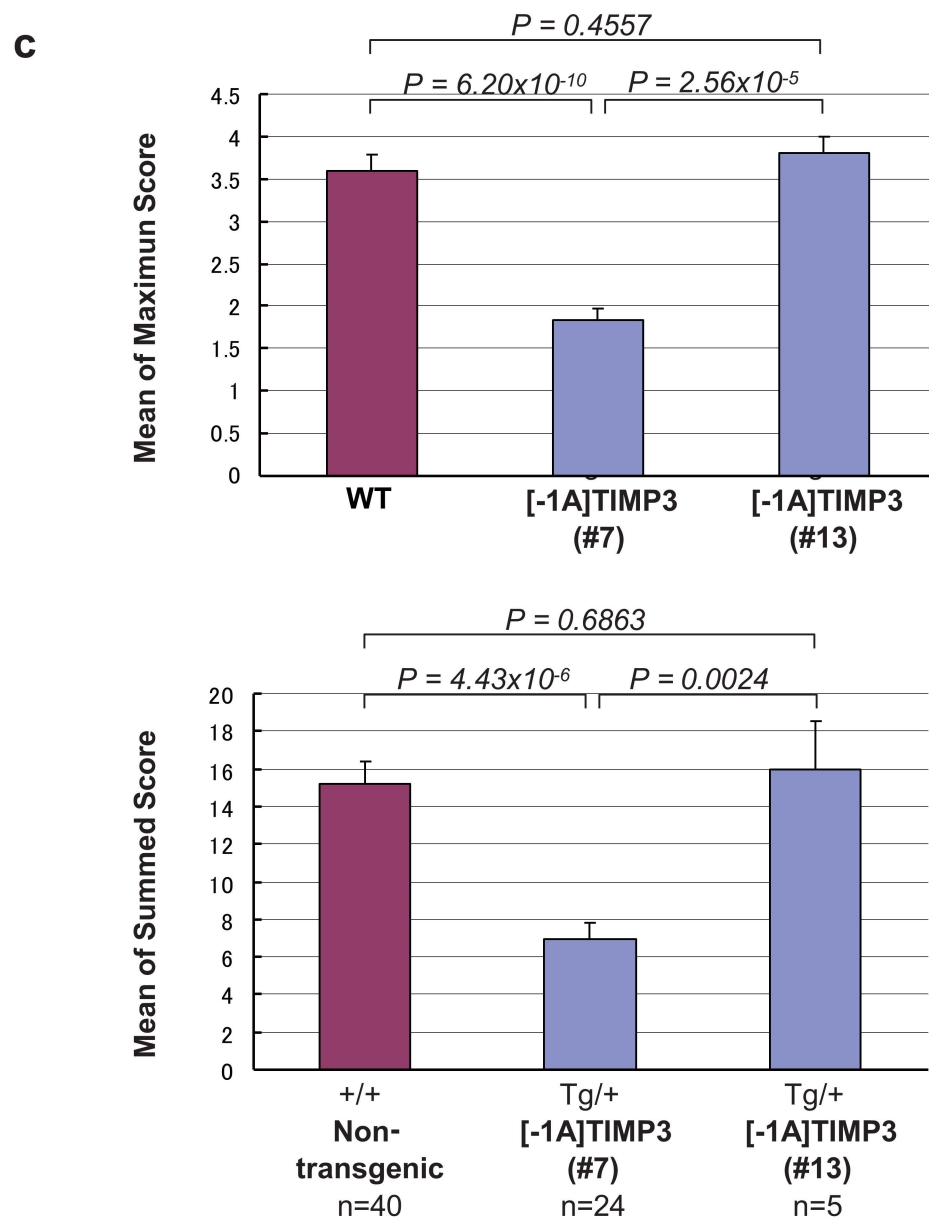

Supplement: 41598_2020_66233_MOESM1_ESM.pdf [file 41598_2020_66233_MOESM1_ESM.pdf]
